# Supplementary material for: Regulation of coin metal substituents and cooperativity on the strength and nature of tetrel bonds
Source: Royal Society of Chemistry journal article supplement (doi:10.1039/c7ra09881b), 2017-01-01
Supplement: c7ra09881b1.pdf [file c7ra09881b1.pdf]

**Table S1** Charge transfer ( $Q_{CT}$ , e) and second-order perturbation energy ( $E^{(2)}$ , kcal/mol) of tetrel bond in the triads as well as their difference ( $\Delta$ ) relative to the corresponding dyads

| triads                               | $Q_{CT}$ | $\Delta Q_{CT}$ | $E^{(2)}$ | $\Delta E^{(2)}$ |
|--------------------------------------|----------|-----------------|-----------|------------------|
| $C_2H_4 \cdots AuCN \cdots CF_4$     | -0.0016  | -0.0031         | 0.11      | 0.02             |
| $C_2H_4 \cdots AuCN \cdots SiF_4$    | -0.0148  | -0.0138         | 11.76     | 8.53             |
| $C_2H_4 \cdots AuCN \cdots GeF_4$    | -0.1239  | -0.0238         | 90.25     | 18.08            |
| $C_2H_4 \cdots AuCN \cdots SnF_4$    | -0.1203  | -0.0113         | 91.02     | 8.75             |
| $C_2H_4 \cdots AgCN \cdots SiF_4$    | -0.0992  | -0.0376         | 64.94     | 24.78            |
| $C_2H_4 \cdots CuCN \cdots SiF_4$    | -0.0789  | -0.0676         | ---       | ---              |
| $C_2(CN)_4 \cdots AuCN \cdots SiF_4$ | 0.0010   | 0.0020          | 1.92      | -0.31            |
| $C_2(CN)_4 \cdots AgCN \cdots SiF_4$ | -0.0022  | 0.0594          | 4.20      | -35.96           |
| $C_2(CN)_4 \cdots CuCN \cdots SiF_4$ | 0.0008   | 0.0121          | ---       | ---              |
| $C_2H_2 \cdots AuCN \cdots SiF_4$    | -0.0132  | -0.0122         | 10.86     | 7.63             |
| $NCAu \cdots C_2H_4 \cdots SiF_4$    | 0.0043   | 0.0049          | ---       | ---              |

Note:  $E^{(2)}$  in the CuCN systems is not shown owing to the abnormal value in the NBO analysis.  $E^{(2)}$  is not shown in  $NCAu \cdots C_2H_4 \cdots SiF_4$  due to the formation of covalent bond between  $C_2H_4$  and AuCN.

**Table S2** Electrostatic ( $E^{\text{ele}}$ ), exchange ( $E^{\text{ex}}$ ), repulsion ( $E^{\text{rep}}$ ), polarization ( $E^{\text{pol}}$ ), dispersion ( $E^{\text{disp}}$ ) energies, and interaction energy ( $\Delta E$ ) of tetrel bond in the triads. All are in kcal/mol

| triads                                                           | $E^{\text{ele}}$ | $E^{\text{ex}}$ | $E^{\text{rep}}$ | $E^{\text{pol}}$ | $E^{\text{disp}}$ | $\Delta E$ |
|------------------------------------------------------------------|------------------|-----------------|------------------|------------------|-------------------|------------|
| $\text{C}_2\text{H}_4 \cdots \text{AuCN} \cdots \text{CF}_4$     | -1.99            | -2.95           | 5.11             | -0.42            | -1.09             | -1.35      |
| $\text{C}_2\text{H}_4 \cdots \text{AuCN} \cdots \text{SiF}_4$    | -19.02           | -22.48          | 42.02            | -6.43            | -1.30             | -7.21      |
| $\text{C}_2\text{H}_4 \cdots \text{AuCN} \cdots \text{GeF}_4$    | -58.48           | -64.02          | 131.72           | -33.91           | 2.34              | -22.35     |
| $\text{C}_2\text{H}_4 \cdots \text{AuCN} \cdots \text{SnF}_4$    | -55.72           | -56.95          | 115.51           | -35.98           | 4.69              | -28.46     |
| $\text{C}_2\text{H}_4 \cdots \text{AgCN} \cdots \text{SiF}_4$    | -52.42           | -60.87          | 121.38           | -28.94           | -0.71             | -21.56     |
| $\text{C}_2\text{H}_4 \cdots \text{CuCN} \cdots \text{SiF}_4$    | -44.82           | -52.61          | 103.69           | -23.04           | -1.08             | -17.87     |
| $\text{C}_2(\text{CN})_4 \cdots \text{AuCN} \cdots \text{SiF}_4$ | -8.70            | -9.42           | 16.88            | -2.01            | -1.20             | -4.45      |
| $\text{C}_2(\text{CN})_4 \cdots \text{AgCN} \cdots \text{SiF}_4$ | -13.11           | -14.16          | 25.76            | -3.44            | -1.54             | -6.49      |
| $\text{C}_2(\text{CN})_4 \cdots \text{CuCN} \cdots \text{SiF}_4$ | -9.60            | -10.00          | 17.92            | -2.23            | -1.36             | -5.27      |
| $\text{C}_2\text{H}_2 \cdots \text{AuCN} \cdots \text{SiF}_4$    | -18.29           | -21.55          | 40.20            | -6.05            | -1.31             | -7.01      |
| $\text{NCAu} \cdots \text{C}_2\text{H}_4 \cdots \text{SiF}_4$    | -4.31            | -7.45           | 13.33            | -0.57            | -2.64             | -1.64      |
